# Supplementary material for: Prolonged treatment with pimelic o-aminobenzamide HDAC inhibitors ameliorates the disease phenotype of a Friedreich ataxia mouse model
Source: PubMed Central journal article supplement (PMC3107941; doi:10.1016/j.nbd.2011.02.016), 2011-06

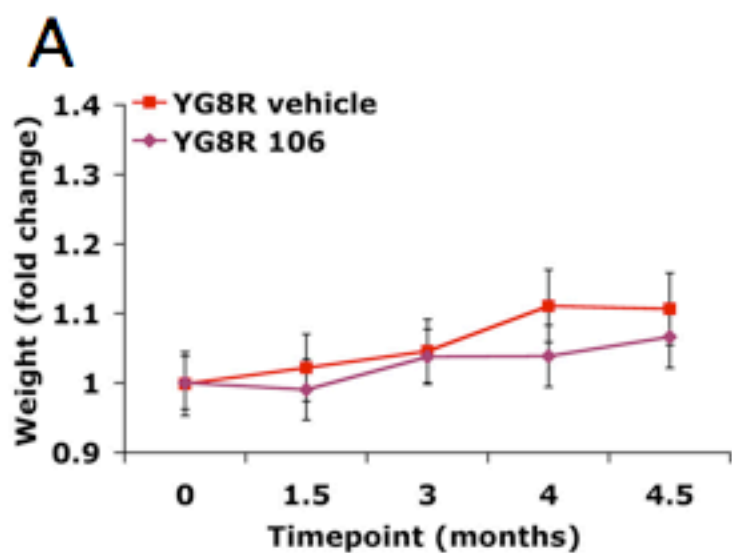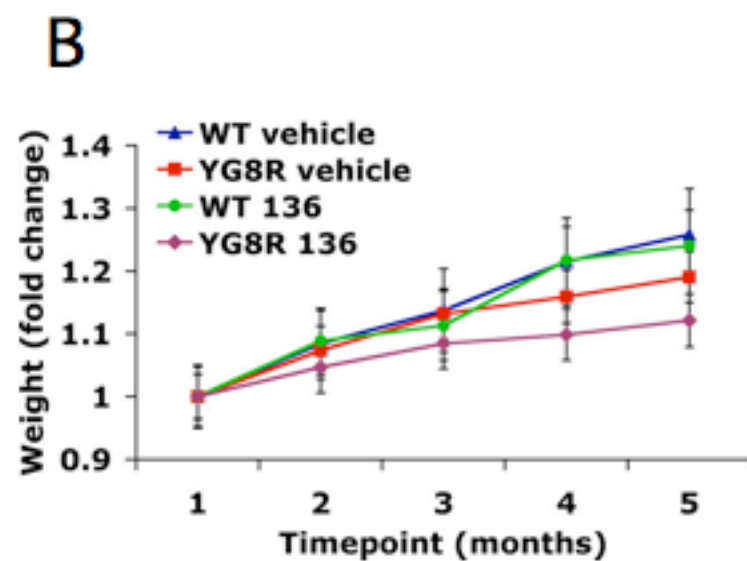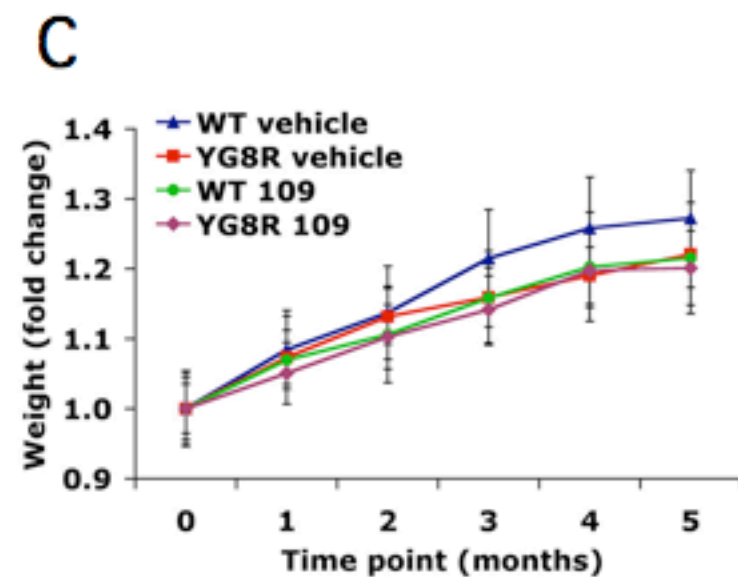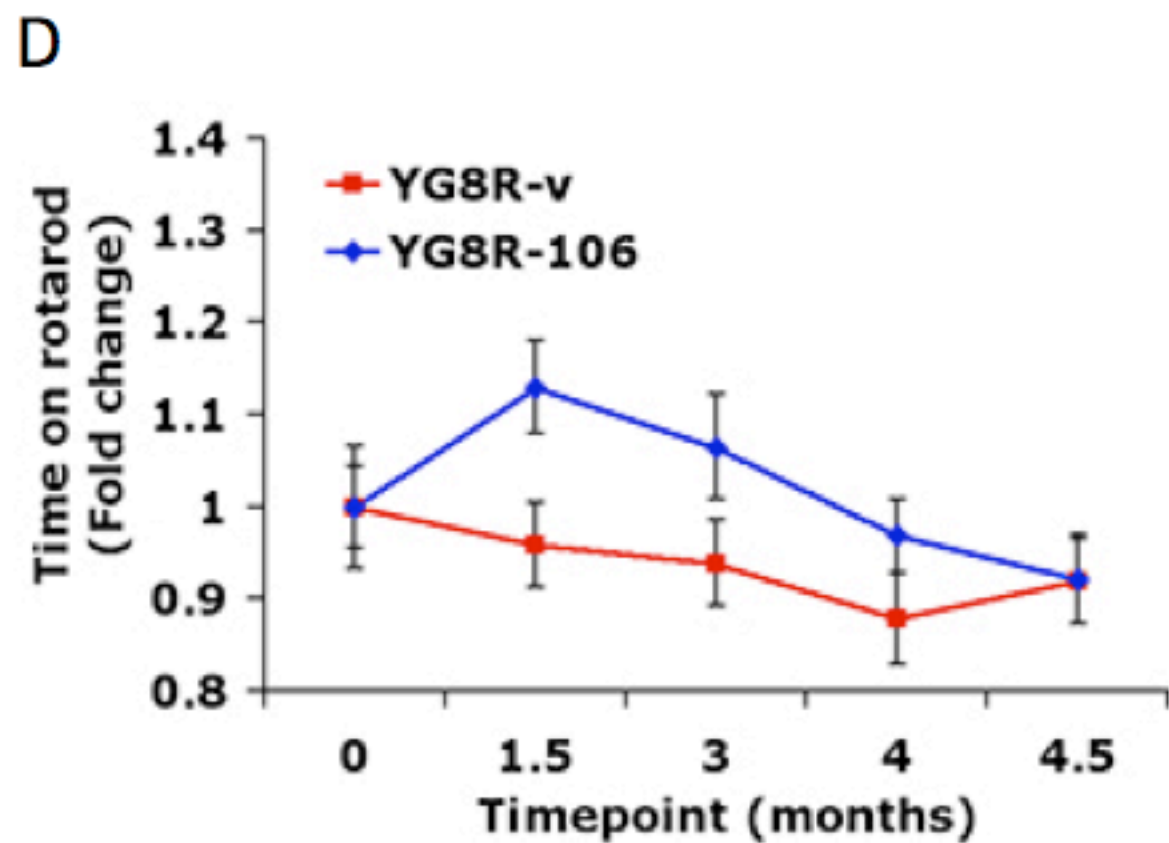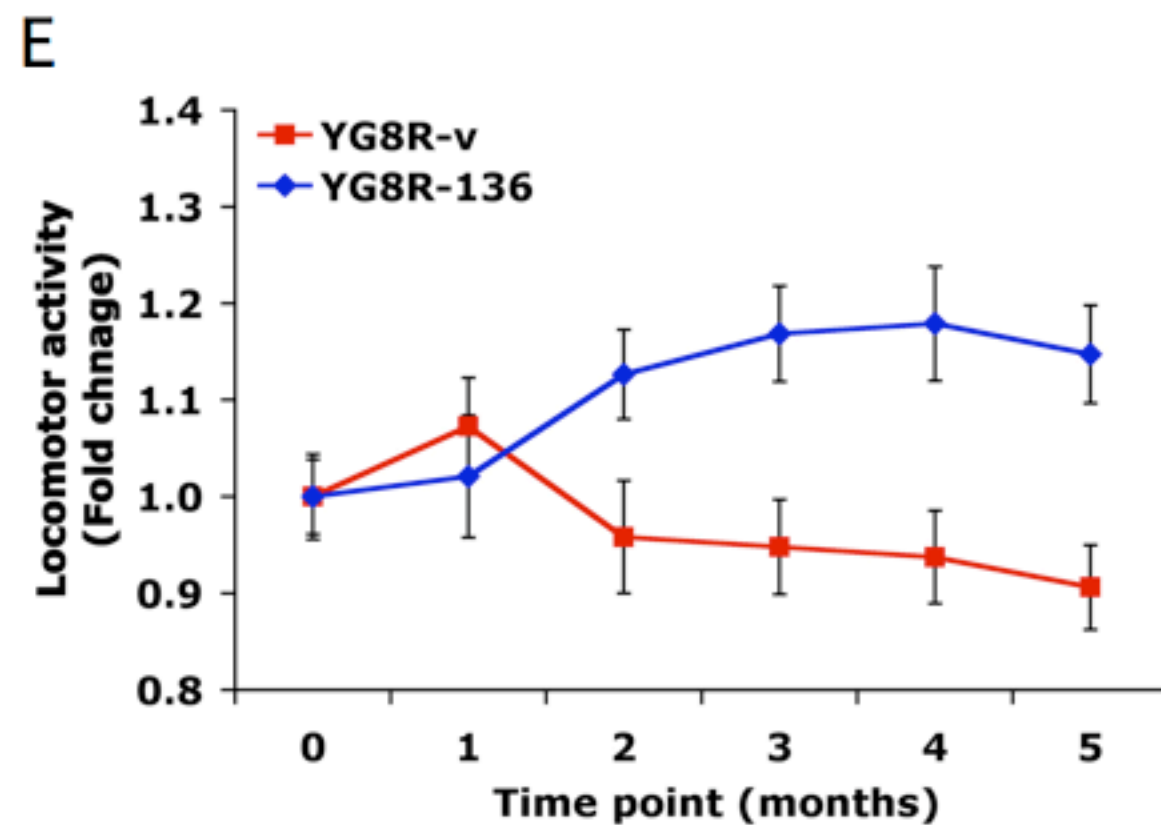

Supplement: mmc1.pdf [file mmc1.pdf]
