# Supplementary material for: Prolonged treatment with pimelic o-aminobenzamide HDAC inhibitors ameliorates the disease phenotype of a Friedreich ataxia mouse model
Source: PubMed Central journal article supplement (PMC3107941; doi:10.1016/j.nbd.2011.02.016), 2011-06

**A**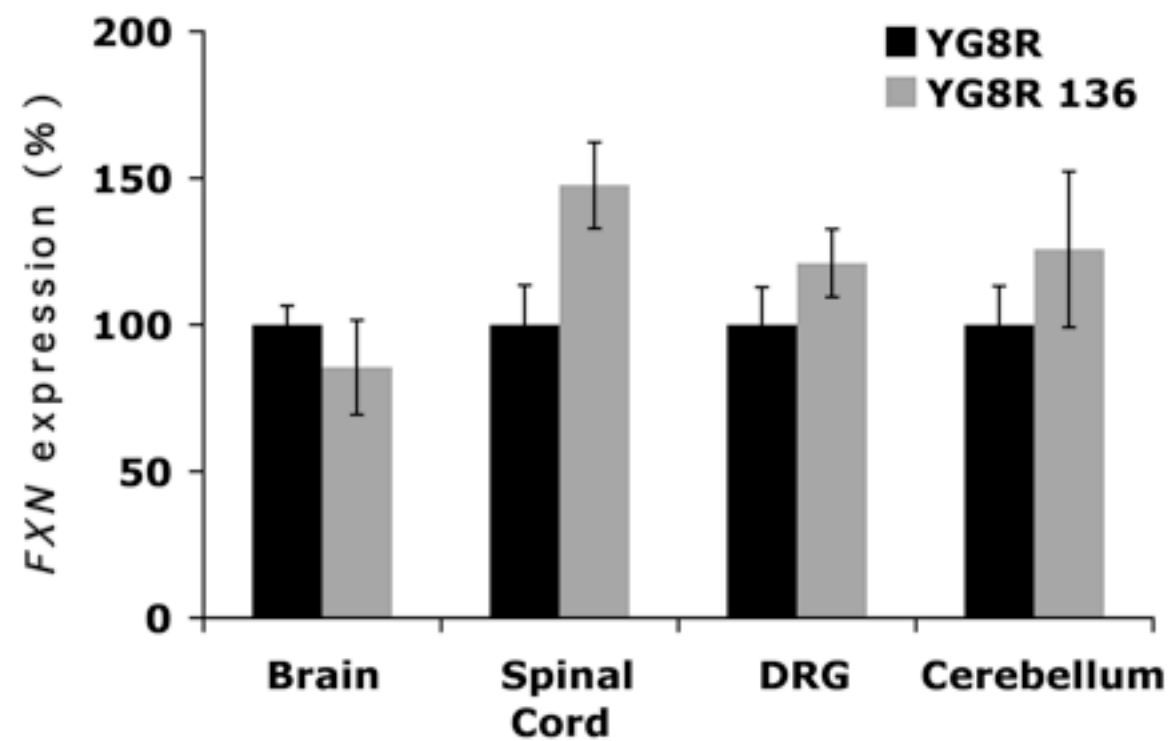**B**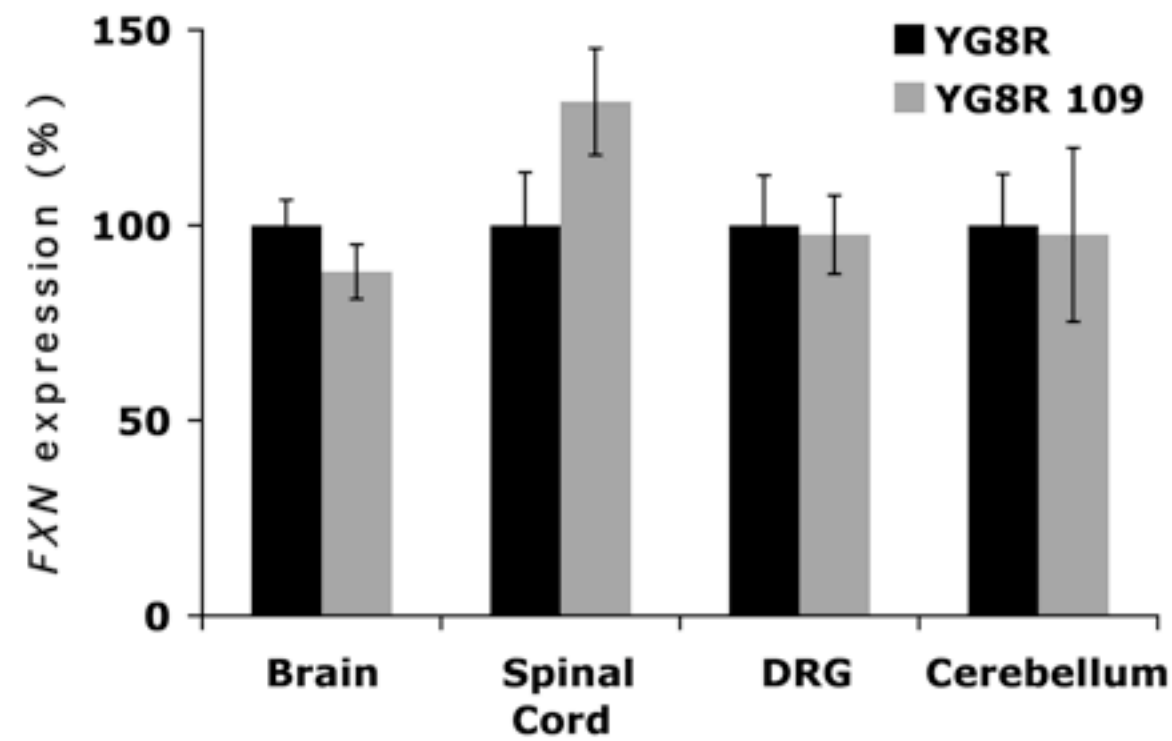**C**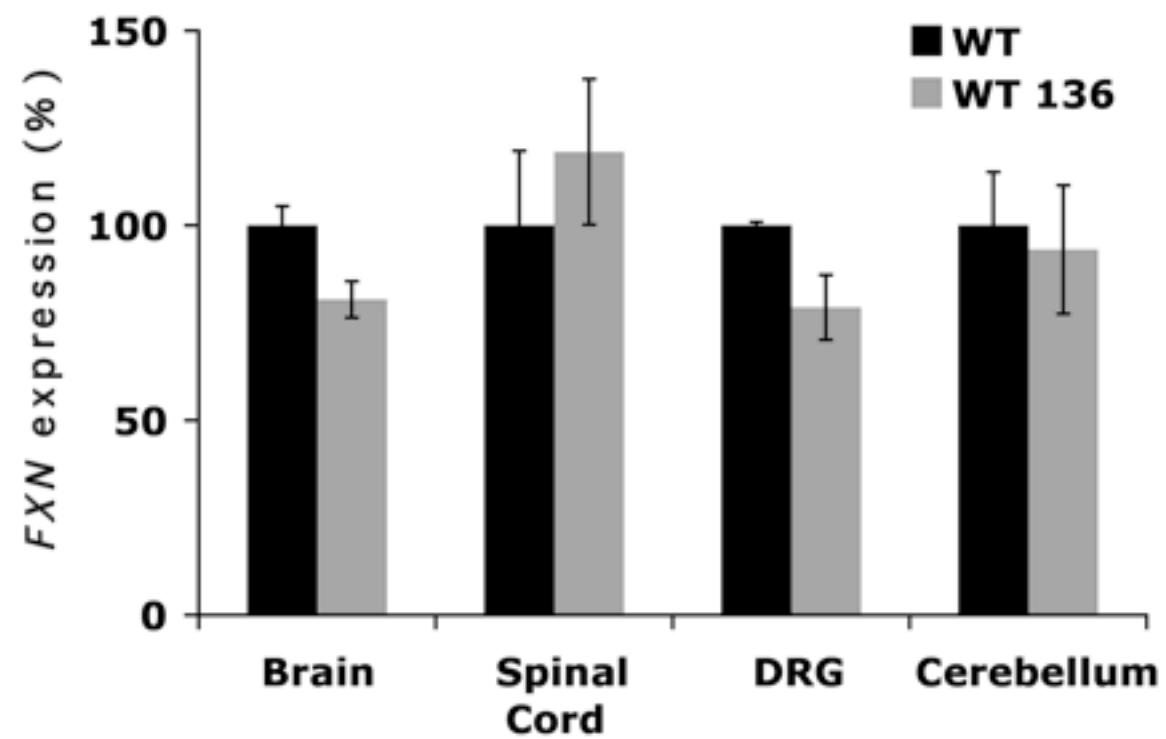**D**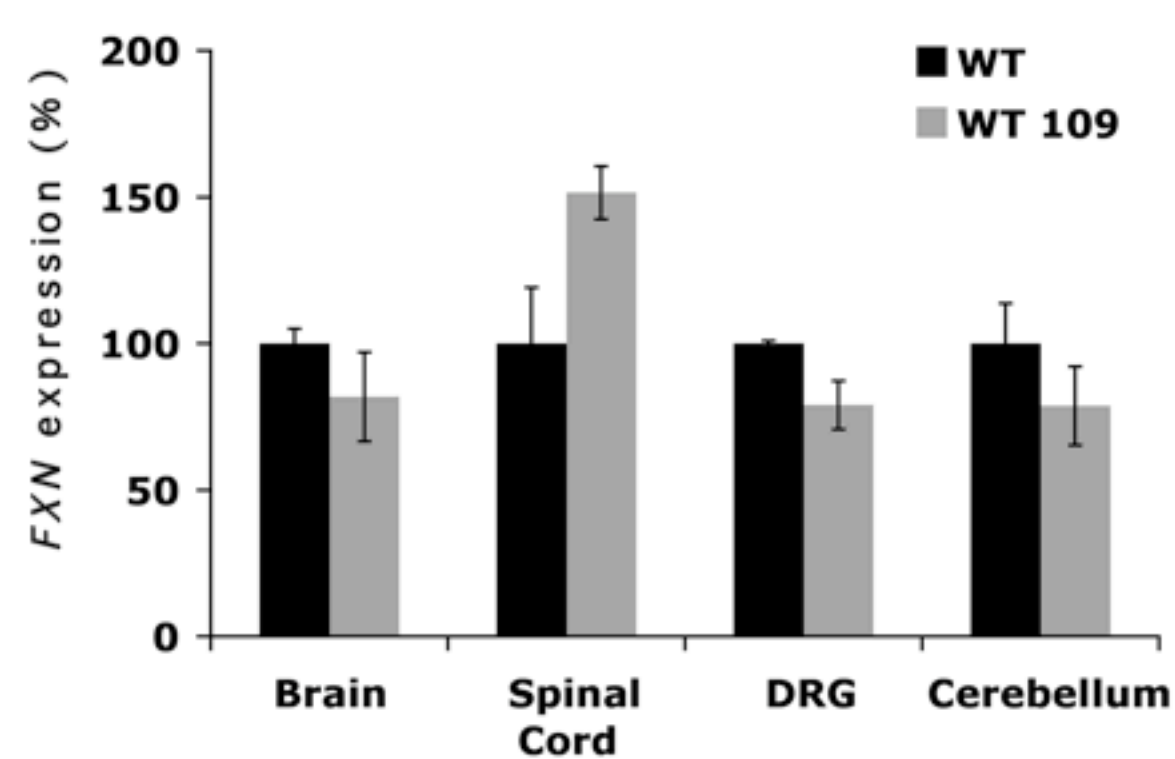

Supplement: mmc3.pdf [file mmc3.pdf]
